# Supplementary material for: A general method for precise chain assembly of noble metal nanoparticles
Source: Royal Society of Chemistry journal article supplement (doi:10.1039/d3qm00229b), 2023-01-01
Supplement: d3qm00229b1.pdf [file d3qm00229b1.pdf]

## Supporting Information

# A General Method for Precise Chain Assembly of Noble Metal Nanoparticles

Xudong Peng,<sup>a</sup> Mengmeng Zhang,<sup>a</sup> Feng Xue,<sup>a</sup> Aodi Zhang,<sup>a</sup> Yue Xu,<sup>a</sup> Yi Huang,<sup>c</sup>  
Hong Wang,<sup>b,\*</sup> and Hongyu Chen<sup>c,\*</sup>

<sup>a</sup> Institute of Advanced Synthesis, School of Chemistry and Molecular Engineering,  
Nanjing Tech University, Nanjing 211816, Jiangsu, P. R. China

<sup>b</sup> Department of Environmental Science and Engineering, University of Science and  
Technology of China, 230026, Hefei, China.

<sup>c</sup> Department of Chemistry, School of Science, Westlake University, 600 Duncun Road,  
Hangzhou 310030, Zhejiang Province, China.

\* Corresponding Emails: [chenhongyu@westlake.edu.cn](mailto:chenhongyu@westlake.edu.cn) (Prof. H. Chen),  
[wanghong82@ustc.edu.cn](mailto:wanghong82@ustc.edu.cn) (Prof. H. Wang).

# Contents

Section S1. Experimental

Section S2. The calculation of SERS enhancement factor.

Section S3. Figure S3-S16.

## Section S1. Experimental

### 1. Chemicals

All chemical reagents were used as purchased without further purification. Hydrogen tetrachloroaurate(III) hydrate ( $\text{HAuCl}_4 \cdot 3\text{H}_2\text{O}$ , 99.9%, metal basis Au 49%) and 2-mercaptobenzo-imidazole-5-carboxylic acid (MBIA, 97.21%) were purchased from Alfa Aesar; Sodium citrate dehydrate (CA, 99%) was purchased from Innochem; Citric acid (99%), hexadecyl trimethyl ammonium bromide (CTAB, 98%), *L*-ascorbic acid (AA, 99%), silver nitrate ( $\text{AgNO}_3$ , 99.9999% trace metals basis), chloroplatinic acid hexahydrate ( $\text{H}_2\text{PtCl}_6 \cdot 6\text{H}_2\text{O}$ , > 37.5% Pt basis), tetraethoxysilane (TEOS, 99%), 4-mercaptobenzoic acid (MBA, technical grade 90%), and 6-mercaptonicotinic acid (6-MNA, technical grade 90%) were purchased from Sigma-Aldrich; Mercaptoacetic acid (MAA, 90%), 3-mercaptopropionic acid (3-MPA, 99%), 3-mercaptobenzoic acid (3-MBA, 96%), *N*-acetyl-*L*-cysteine (99%), 3-mercapto-1-propanol (97%), 4-ethynylbenzoic acid (4-EBA, 95%), 2,2'-Dithiosalicylic acid (DTSA, 96%) and ammonia solution (AR, 25-28%) were purchased from Aladdin; 4-Mercaptophenylacetic acid (4-MPAA, 97%) was purchased from Picasso; 2-mercaptonicotinic acid (2-MNA, 99.93%) was purchased from Leyan. Ethanol (EtOH), and 2-naphthalenethiol (99%) were purchased from Rhawn; Isopropanol (IPA), and tetrahydrofuran (THF) were purchased from Sinopharm Chemical Reagent. Ultrapure deionized water (18.2 M $\Omega$ /cm) was used for all solution preparations.

### 2. Measurements and characterizations

Transmission electron microscopy (TEM) images were collected on a Hitachi HT7800 operated at 80 kV. UV-Vis-NIR spectra were collected on a Mettler Toledo UV7. Dynamic Light Scattering (DLS) and Zeta potential were collected on a Brookhaven

BI-200SM. Raman spectra and SERS were collected from colloidal samples in a quartz cuvette (path length = 1.00 cm) on a portable Raman analyzer (Accuman SR-510 Pro) equipped with 785 nm laser (350 mW). The integration times are 3 or 10s for different samples.

### *3. Preparation of Au-chains@silica*

The citrate-stabilized AuNPs ( $d = 15, 40, 60$  and  $80$  nm) were synthesized according to the literatures<sup>1-3</sup>. The concentration of AuNPs ( $d = 15, 40, 60$  and  $80$  nm) were about  $1.47 \times 10^{12}$ ,  $1.41 \times 10^{11}$ ,  $4.76 \times 10^{10}$ ,  $1.96 \times 10^{10}$  NP/mL, respectively. The synthesis of Au-chains@silica was as follows: the pre-synthesized AuNPs ( $d = 40$  nm, 1 mL) was concentrated to 6  $\mu$ L via centrifugation and dispersed into the mixture containing 92  $\mu$ L EtOH and 8  $\mu$ L water. After adding the ligand MBA (1.2 mM in EtOH, 10  $\mu$ L), the mixture solution ( $V_{\text{EtOH}}: V_{\text{water}} = 7.3: 1$ ) was incubated at room temperature. After 2 h, the Au chains were formed and trapped by silica encapsulation. In detail, the obtained Au-chain solution was mixed with 0.31 mL H<sub>2</sub>O, 0.554 mL IPA (containing 1.6  $\mu$ L TEOS/1 mL IPA), and 20  $\mu$ L ammonium. Then, the mixture solution was incubated at room temperature for 6 h.

The same method was used to prepare Au-chains@silica of other sizes ( $d = 15, 60$  and  $80$  nm). There are slight differences in the MBA concentration, the EtOH/water ratio, and the amount of TEOS: For 60 nm AuNPs, [MBA] = 2 mM; For 80 nm AuNPs, [MBA] = 2.25 mM; For 15 nm AuNPs, [MBA] = 0.6 mM,  $V_{\text{EtOH}}/V_{\text{water}} = 9.5: 1$ , and 0.554 mL IPA (containing 0.9  $\mu$ L TEOS/1 mL IPA) were used instead.

Scale-up synthesis of Au-chains@silica: The same method was used to prepare 100 mL Au-chains@silica, all volumes are expanded by 100 times.

### *4. Preparation of salt-induced Au-aggregates.*

*Method 1:* The salt-induced aggregation of AuNPs ( $d = 40$  nm) in the DMF-water solution was modified from our previously reported methods<sup>4</sup>. In a typical process, the 1 mL synthesized AuNPs were purified and concentrated via centrifugation. The concentrated AuNPs (6  $\mu$ L) were mixed with 90  $\mu$ L DMF, 6.67  $\mu$ L 2-naphthalenethiol (3 mg/mL in DMF), and 3.33  $\mu$ L NaOH aqueous solution (2.5 mM). Then, the mixture was incubated at 60 °C for 2 h. After that, NaCl (10 mM, 10  $\mu$ L) was added into the

mixture, to induce the aggregation of AuNPs. Finally, the mixture ( $[\text{NaCl}]_{\text{final}} = 0.862$  mM) was incubated at room temperature for another 2 h.

*Method 2:* The aggregation occurred in the ethanol-water solution. The 3 mL synthesized AuNPs ( $d = 40$  nm) were purified via centrifugation, and the concentrated AuNP solution (6  $\mu\text{L}$ ) was dispersed into the solution containing 209  $\mu\text{L}$  EtOH, 4  $\mu\text{L}$  MBA (4 mM in EtOH), 91  $\mu\text{L}$  water. Then, the mixture ( $[\text{MBA}]_{\text{final}} = 0.05$  mM) was incubated at room temperature. After 2 h, 10  $\mu\text{L}$  20 mM NaCl aqueous solution was added into the mixture to induce the aggregation of AuNPs. Such mixture ( $[\text{NaCl}]_{\text{final}} = 0.625$  mM) was incubated at room temperature for another 2 h. Finally, the mixture was mixed with 0.93 mL  $\text{H}_2\text{O}$ , 1.662 mL IPA (containing 1.6  $\mu\text{L}$  TEOS/1 mL IPA), and 60  $\mu\text{L}$  ammonium solution. After incubation at room temperature for 6 h, the Au-chains@silica nanostructures were obtained.

#### *5. Preparation of Au-chains@silica with different solvent.*

Similar procedure described in Section 2.3 was used for preparing Au-chains@silica with different solvents. The solvent IPA and THF were used to instead EtOH. In IPA system, the volume of IPA and water are 88 and 12  $\mu\text{L}$ , respectively. In THF system, the volume of THF and water are 85 and 15  $\mu\text{L}$ , respectively.

#### *6. Preparation of Au-chains@silica with different ligands*

Similar procedure described in Section 2.3 was used, where different ligands were employed to modified Au-chains. For clarification, the synthetic conditions for each ligand were listed in Table 2. It should be noted that the degree of aggregation was determined by the color change (red to dark purple), and the incubation time differed a bit.

#### *7. Preparation of Ag-chains@silica*

The citrate-stabilized AgNPs ( $d = 25$  and 45 nm) were synthesized according to the literature method<sup>5</sup>. The concentration of AgNPs ( $d = 25$  and 45 nm) were about  $3.78 \times 10^{12}$  and  $3.78 \times 10^{11}$  NP/mL, respectively. The synthesized AgNPs (0.5 mL,  $d = 25$  nm) were purified and concentrated via centrifugation. The concentrated AgNP solution (20  $\mu\text{L}$ ) was dispersed into 86  $\mu\text{L}$  EtOH. In the presence of vortexing, 10  $\mu\text{L}$  MBA (16 mM in EtOH) was added into the AgNP solution in five times, to slow down the aggregation

rate of AgNPs. Then, the mixture ( $V_{\text{EtOH}}: V_{\text{water}} = 4.8: 1$ ) was incubated at room temperature. The colour changed from light yellow to red, brick-red, and finally green. After 2 h, the Ag chain was formed and mixed with 0.31 mL H<sub>2</sub>O, 0.554 mL IPA (containing 1.6  $\mu\text{L}$  TEOS/1 mL IPA), and 20  $\mu\text{L}$  ammonium. Finally, the mixture was further incubated at room temperature for 6 h. The similar method was used to synthesize the Ag-chains@silica in other size, where 45 nm AgNPs (1 mL) and 10  $\mu\text{L}$  MBA (3 mM in EtOH) were used instead.

#### *8. Preparation of Pt-chains@silica*

The citrate-stabilized PtNPs ( $d = 29$  and  $42$  nm) were synthesized according to the literature method<sup>6</sup>. The concentration of AgNPs ( $d = 25$  and  $45$  nm) were about  $4.32 \times 10^{11}$  NP/mL. To obtain Pt-chains@silica nanostructures, the synthesized PtNPs (0.5 mL,  $d = 29$  nm) were purified and concentrated via centrifugation. The concentrated PtNP (6  $\mu\text{L}$ ) was dispersed into the mixture containing 92  $\mu\text{L}$  EtOH and 8  $\mu\text{L}$  water, After introducing 10  $\mu\text{L}$  MBA (1.8 mM in EtOH), the mixture ( $V_{\text{EtOH}}: V_{\text{water}} = 7.3: 1$ ) was incubated at room temperature. The colour becomes slightly lighter and there is no precipitate at the bottom of the samples. After 2 h, the Pt chain was formed and further mixed with 0.31 mL H<sub>2</sub>O, 0.554 mL IPA (containing 2.3  $\mu\text{L}$  TEOS/1 mL IPA), and 20  $\mu\text{L}$  ammonium. Finally, the mixture was incubated at room temperature for another 6 h. The similar method was used to synthesize Pt-chains@silica of other size, where 42 nm PtNPs and 10  $\mu\text{L}$  MBA (5.3 mM in EtOH) were used instead.

## Section S2. The calculation of SERS enhancement factor:

We employed the peak  $1586\text{ cm}^{-1}$  of MBA to calculate the SERS enhancement factor (EF) of Au-chains@silica nanostructures. The calculation is based on the following Equation 1:

$$EF = (I_{\text{SERS}} \times C_{\text{bulk}}) / (I_{\text{bulk}} \times C_{\text{SERS}}) \quad \text{Equation (1)}$$

Where  $I_{\text{SERS}}$  and  $I_{\text{bulk}}$  are the Raman intensities of the  $1586\text{ cm}^{-1}$  peak for Au-chains@silica and pure MBA.  $C_{\text{SERS}}$  and  $C_{\text{bulk}}$  are the concentrations of MBA on/in Au-chains@silica and in pure solution. For the selection of  $I_{\text{bulk}}$ , we made a 0.15 M MBA aqueous solution in 1.25 M NaOH. By stepwise diluting, we got titration plots of SERS intensities vs [MBA] (Figure S1). Within this titration plots, the  $I_{\text{bulk}}$  should be in the range with fine linear ship between Raman intensity and [MBA]. Thus, we selected Raman intensity corresponding to 0.12 M as  $I_{\text{bulk}}$ .

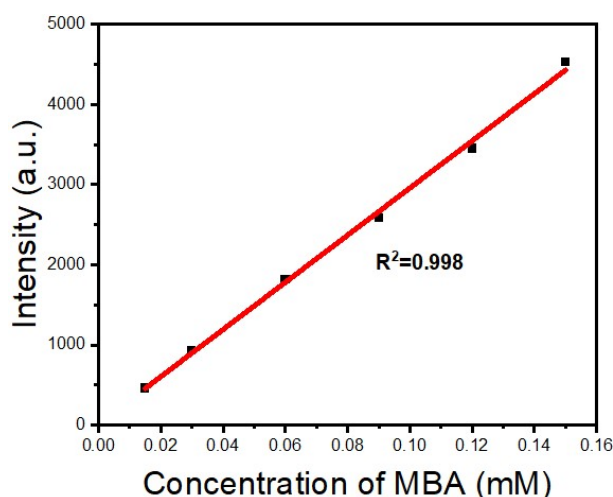

**Figure S1.** Linear fit for Raman intensity of MBA.

Calculation:

The concentration of the as-synthesized 40 nm AuNP solution can be estimated from the total amount of Au used in the synthesis, the density of Au, and the volume of each AuNP. Here, we assume that the as-synthesized 40 nm AuNPs are ideally uniform in size and shape.

The density of AuNPs is  $19.32\text{ g/cm}^3$ , and the volume of 40 nm AuNP is

$$V_{\text{Au}} = \frac{4}{3}\pi r^3 = \frac{4}{3}\pi (20 \times 10^{-9})^3\text{ m}^3 = 3.35 \times 10^{-23}\text{ m}^3$$

Weight of Au (including Au seeds and hydrogen tetrachloroaurate(III) hydrate) in the as-synthesized 40 nm AuNP solution = 5 mg

Weight of each 40 nm AuNP =  $\rho_{\text{Au}} \times V_{\text{Au}} = 6.47 \times 10^{-19} \text{ kg} = 6.47 \times 10^{-13} \text{ mg}$

Total number of 40 nm AuNPs =  $5 \text{ mg} / 6.47 \times 10^{-13} \text{ mg} = 7.73 \times 10^{12} \text{ particles} = 1.28 \times 10^{-11} \text{ mol}$

Total volume of the synthesis solution = 55 mL

Concentration of the as-synthesized 40 nm AuNP solution =  $1.28 \times 10^{-11} \text{ mol} / 0.055 \text{ L} = 23.27 \times 10^{-11} \text{ M} = 232.7 \text{ pM}$

According to the literature<sup>7</sup>, surface area of one ligand binding site on Au surface:  $S = 0.2155 \text{ nm}^2$

The Surface area of 40 nm AuNP is:

$$S_{\text{Au}} = 4\pi r^2 = 5026.5 \text{ nm}^2$$

Total number of ligand binding sites on the surface of NP =  $C \times S_{\text{Au}} / 0.2155 = 5.4 \times 10^3 \text{ nM}$

$I_{\text{SERS}} = 15623 \text{ counts}$ ,  $I_{\text{bulk}} = 3449 \text{ counts}$ ,  $C_{\text{bulk}} = 120 \text{ mM}$

$EF_{\text{MBA}} = (I_{\text{SERS}} \times C_{\text{bulk}}) / (I_{\text{bulk}} \times C_{\text{SERS}}) = 1.01 \times 10^5$ .

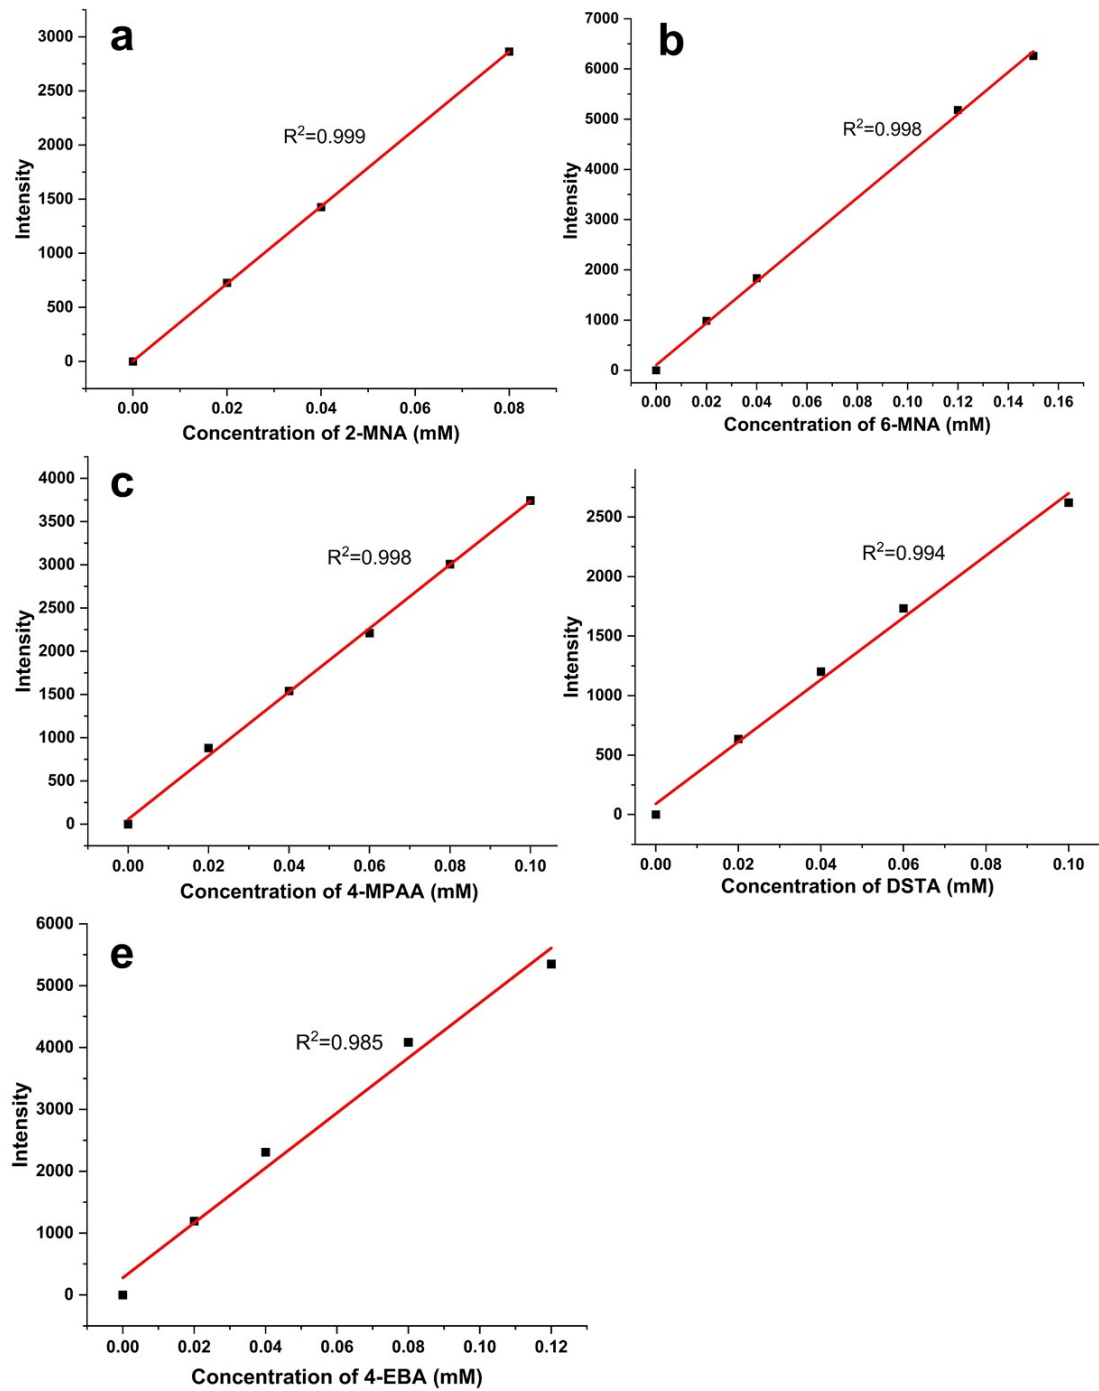

**Figure S2.** Linear fit for Raman intensity of (a) 2-MNA, (b) 6-MNA, (c) 4-MPAA, (d) DSTA, and (e) 4-EBA.



**Table S1.** The enhancement factor (EF) of 40 nm Au-chains@silica prepared with different SERS-active ligands.

| Ligand | Raman Shift (cm <sup>-1</sup> ) | Ligand Concentration <sup>1</sup> (M) | SERS Intensity <sup>2</sup> | Ligand Concentration <sup>3</sup> (nM) | SERS Intensity of Monomer AuNPs | SERS Intensity of Au Chains <sup>4</sup> | I <sub>chains</sub> /I <sub>monomer</sub> | Enhancement Factor <sup>5</sup> |
|--------|---------------------------------|---------------------------------------|-----------------------------|----------------------------------------|---------------------------------|------------------------------------------|-------------------------------------------|---------------------------------|
| 2-MNA  | 1038                            | 0.1                                   | 3578                        | 5.4 × 10 <sup>3</sup>                  | 210                             | 10168                                    | 48.4                                      | 5.26×10 <sup>4</sup>            |
| 6-MNA  | 1078                            | 0.15                                  | 6348                        | 5.4 × 10 <sup>3</sup>                  | 659                             | 23979                                    | 36.4                                      | 1.05×10 <sup>5</sup>            |
| 4-MPAA | 1062                            | 0.1                                   | 3737                        | 5.4 × 10 <sup>3</sup>                  | 283                             | 12144                                    | 42.9                                      | 6.02×10 <sup>4</sup>            |
| DSTA   | 1017                            | 0.1                                   | 2699                        | 5.4 × 10 <sup>3</sup>                  | 443                             | 11584                                    | 26.1                                      | 7.95×10 <sup>4</sup>            |
| 4-EBA  | 1592                            | 0.1                                   | 4789                        | 5.4 × 10 <sup>3</sup>                  | 411                             | 11829                                    | 28.8                                      | 4.57×10 <sup>4</sup>            |

**Table S2.** The enhancement factor of 42 nm Ag-chains@silica prepared with different SERS-active ligands.

| Ligand | Ligand Concentration <sup>3</sup> (mM) | Raman Shift (cm <sup>-1</sup> ) | SERS Intensity of Monomer AgNPs | SERS Intensity of Ag Chains <sup>4</sup> | I <sub>chains</sub> /I <sub>monomer</sub> |
|--------|----------------------------------------|---------------------------------|---------------------------------|------------------------------------------|-------------------------------------------|
| 3-MBA  | 0.431                                  | 983                             | 121                             | 2790                                     | 23.1                                      |
| MBIA   | 0.323                                  | 1267                            | 100                             | 4418                                     | 44.2                                      |
| 2-MNA  | 0.517                                  | 1041                            | 319                             | 4959                                     | 15.5                                      |
| 6-MNA  | 0.302                                  | 1087                            | 339                             | 7711                                     | 22.7                                      |
| MBA    | 0.259                                  | 1065                            | 1176                            | 10142                                    | 8.6                                       |

**Annotation:**

1. The concentration of free ligands dispersed in 1.25 M NaOH aqueous solution.
2. SERS intensity of free ligands dispersed in 1.25 M NaOH aqueous solution.
3. The concentration of ligands presented in the solution was enough to fully cover the AuNP and AgNP surface.
4. SERS intensity of Au-chains@silica and Ag-chains@silica were measured in the colloidal solution.
5. EF of ligands was calculated by the method in **Section S2**.

**Section S3. Figure S3-S17.**

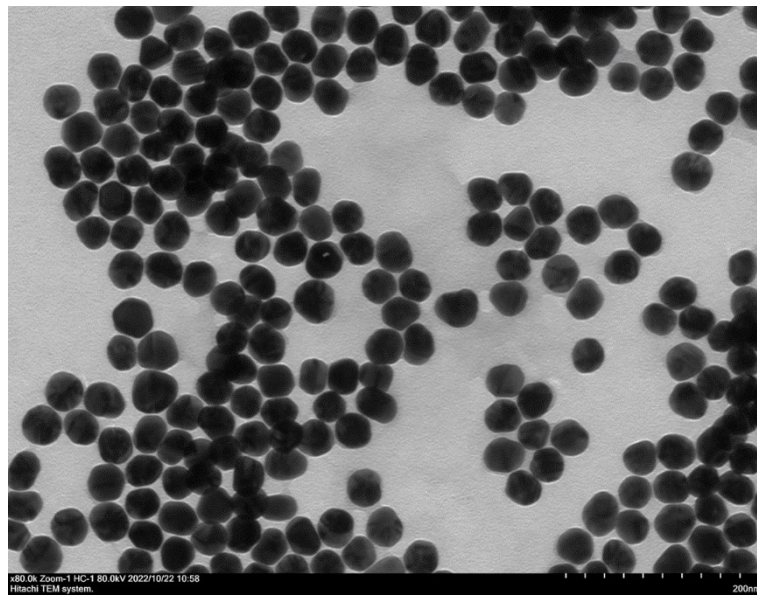

**Figure S3.** TEM image of the citrate-stabilized 40 nm AuNPs.

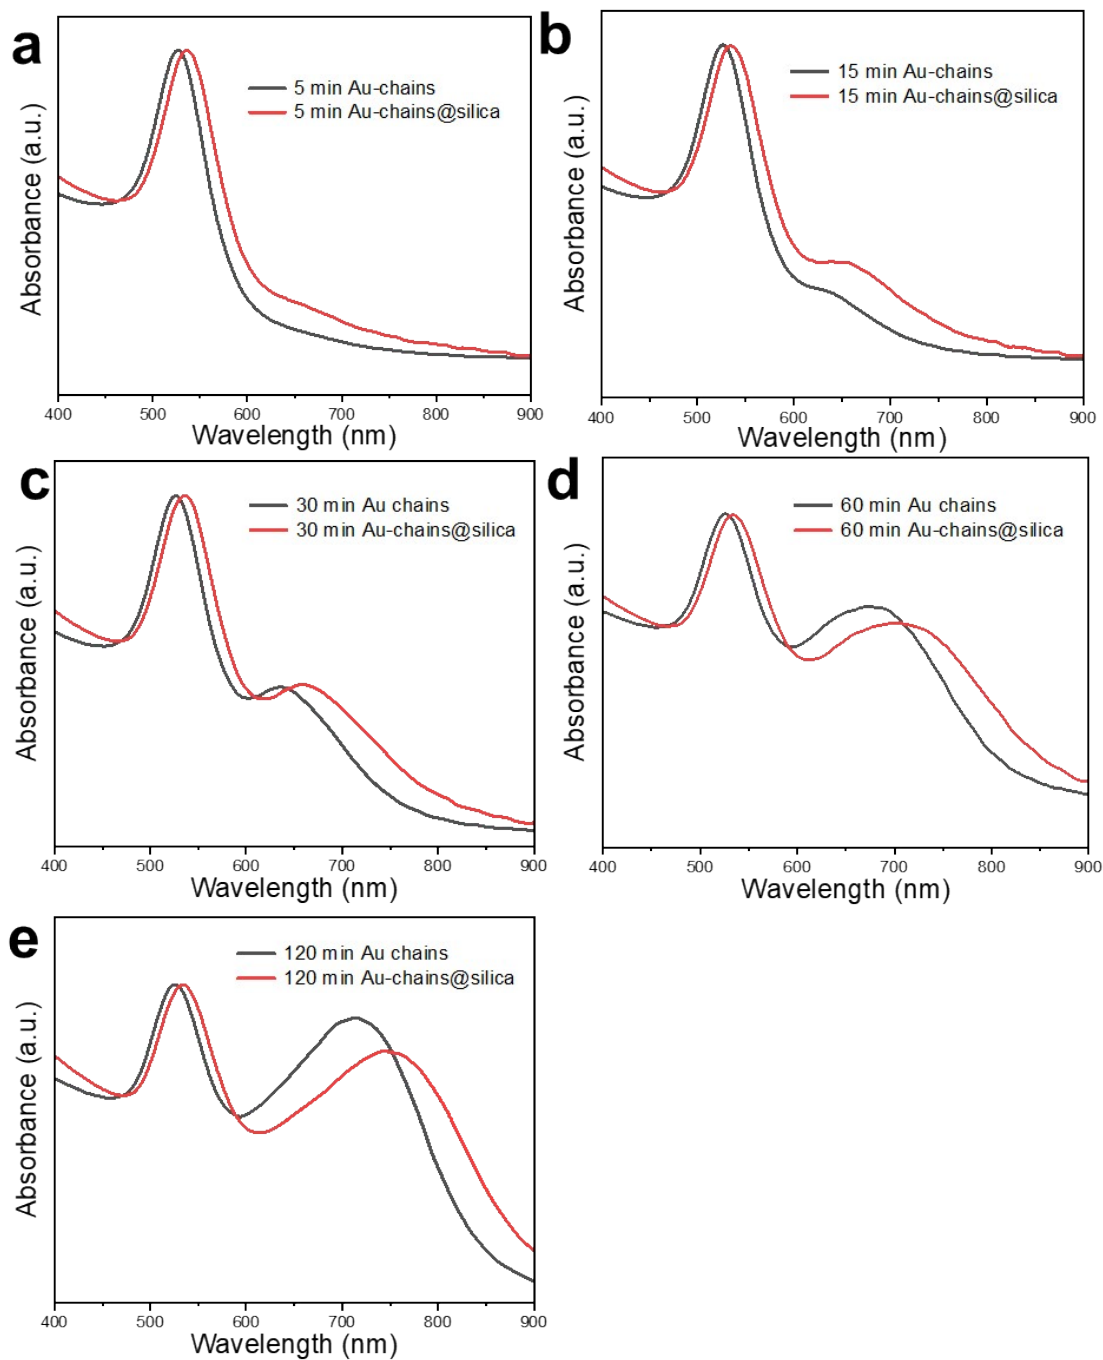

**Figure S4.** The UV-Vis extinction spectra of Au-chains before and after the silica encapsulation measured at (a) 5, (b) 15, (c) 30, (d) 60, and (e) 120 min, respectively.

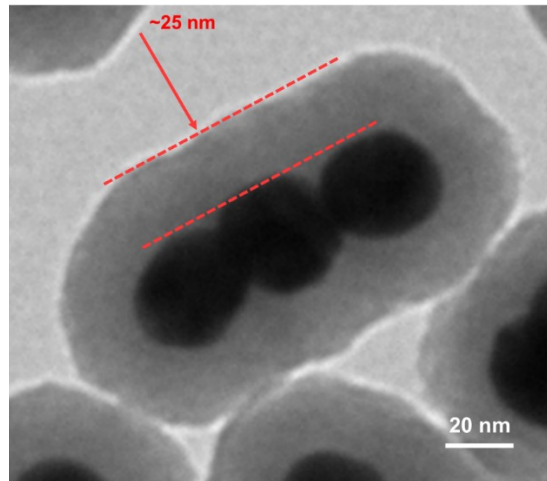

**Figure S5.** High magnification TEM image of Au-chain@silica nanostructure and the thickness of the silica shell.

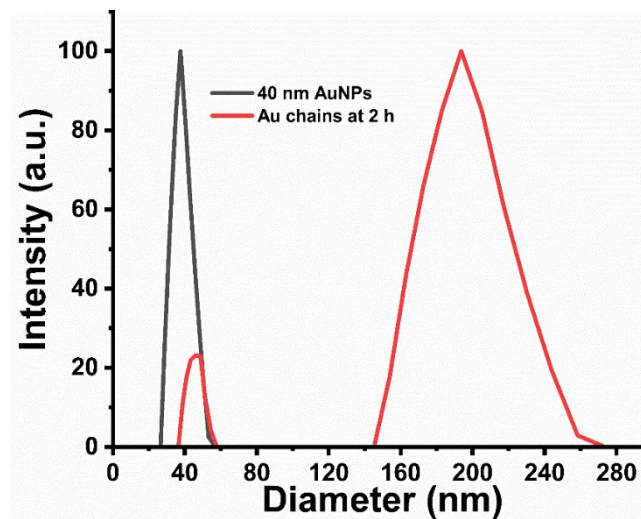

**Figure S6.** DLS of the AuNPs and Au chains (without silica encapsulation) formed under the standard condition (2 h incubation time).

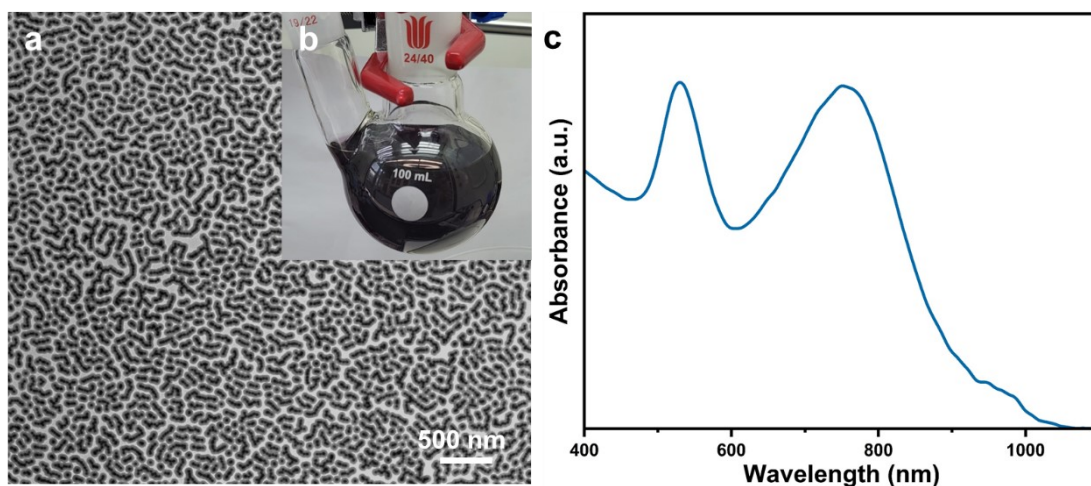

**Figure S7.** (a) The TEM image of Au-chains@silica at low magnification; inset, a photograph showing the product of a scaled-up synthesis (100 mL); (b) The UV-Vis extinction spectrum of the Au-chains@silica.

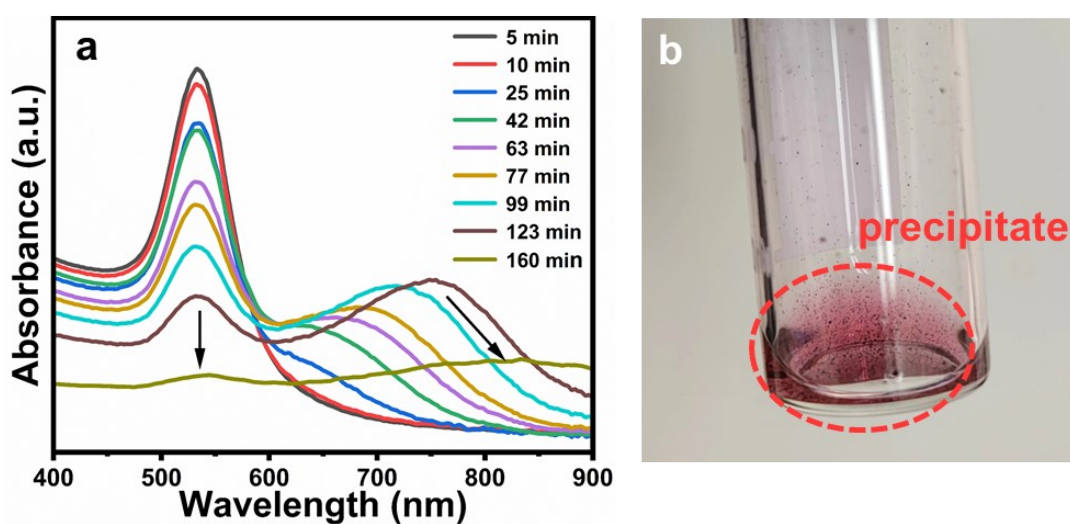

**Figure S8.** (a) UV-Vis spectra of Au aggregates formed in 2-naphthalenol/DMF solution with the varied incubation time: 5-160 min; (b) The photograph showing the precipitate appeared at 63 min.

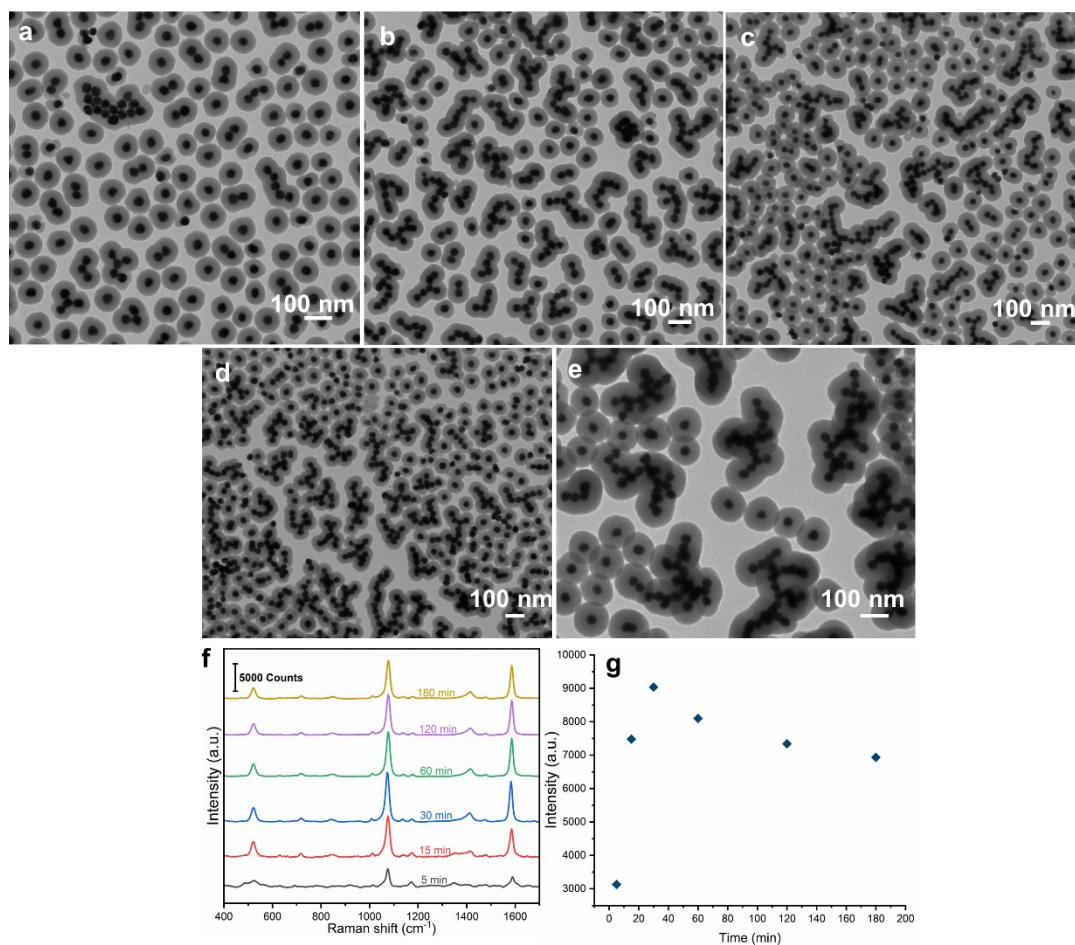

**Figure S9.** Large-area TEM images of Au-aggregates@silica nanostructures trapped at different time: (a) 5 min, (b) 30 min, (c) 60 min, (d) 120 min, and (e) 180 min; (f) SERS of the corresponding Au-aggregates@silica nanostructures; (h) SERS trace of the  $1073 \text{ cm}^{-1}$  peak for the Au-aggregates@silica nanostructures against the incubation time.

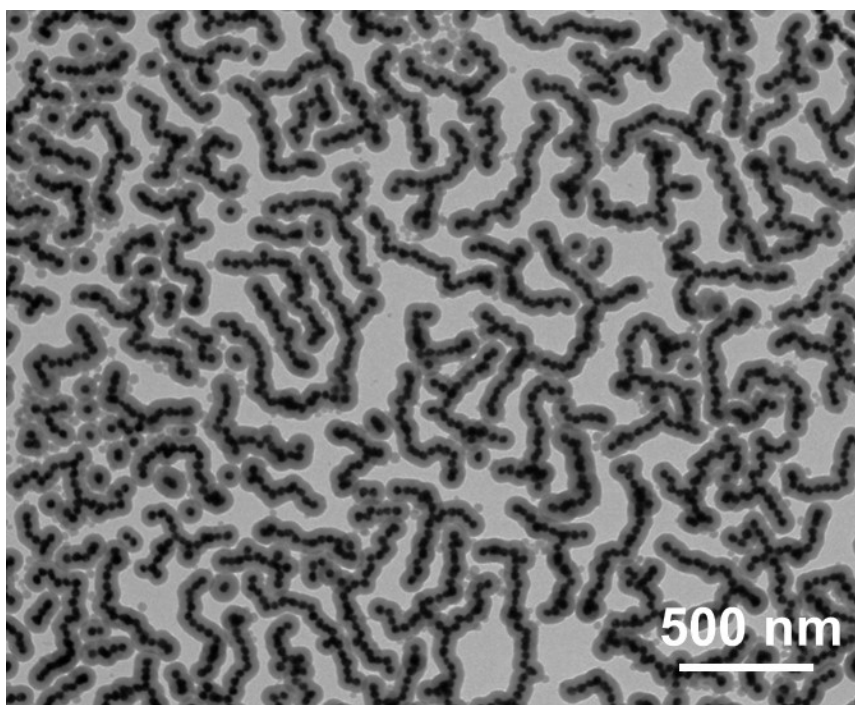

**Figure S10.** TEM image of Au-chains@silica prepared using [MBA] of 0.207 mM (200% of the standard condition).

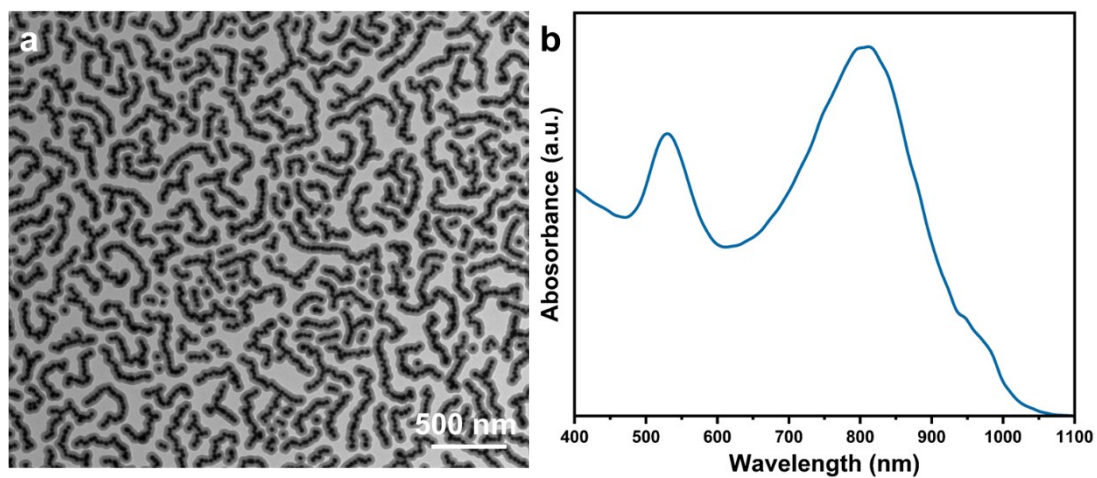

**Figure S11.** (a) TEM image and (b) UV-Vis spectrum of Au-chains@silica prepared with the 0.138 mM of [MBA] (134% of the standard condition) and the incubation time of 6 h (300% of the standard condition).

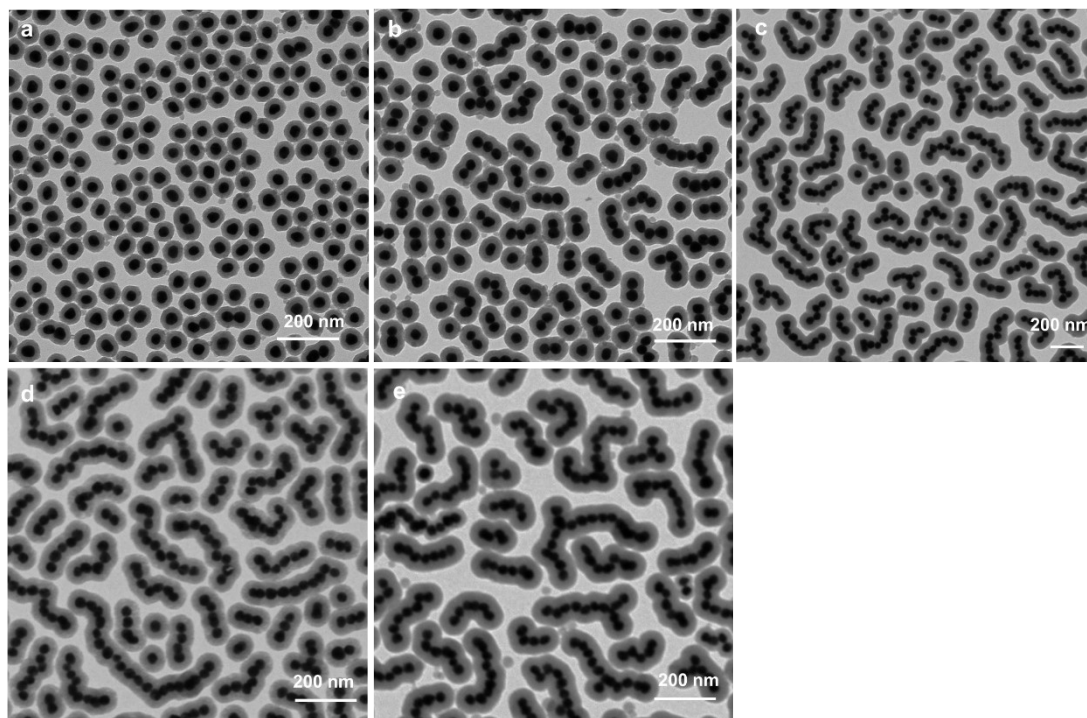

**Figure S12.** TEM images of Au-chains@silica prepared with different ethanol to water ratio: (a) 1.5: 1, (b) 3.5: 1, (c) 4.8: 1, (d) 7.3: 1, and (e) 13.5: 1.



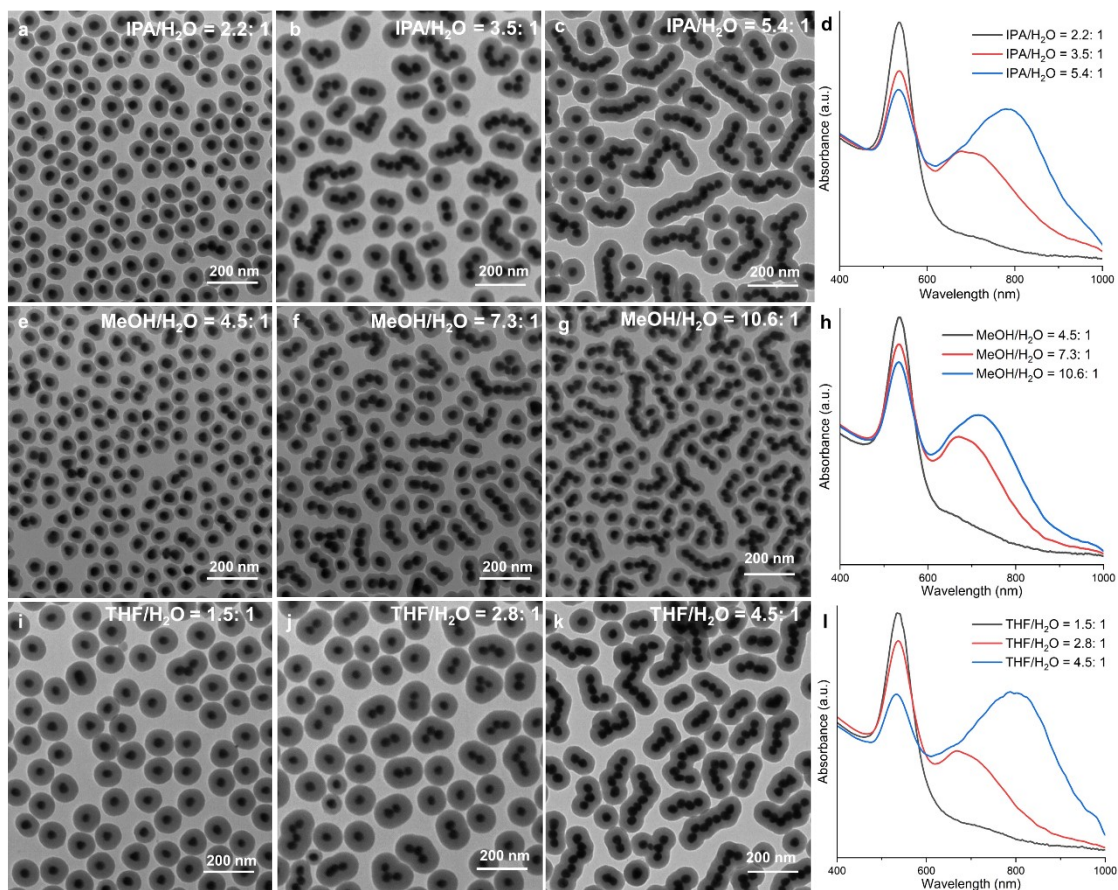

**Figure S13.** TEM images of Au-chains@silica prepared with different non-polar solvent to water ratio: IPA to water ratio (a) 2.2: 1, (b) 3.5:1, (c) 5.4: 1, and (d) their UV-Vis spectra; MeOH to water ratio (e) 4.5: 1, (f) 7.3:1, (g) 10.6: 1, and (h) their UV-Vis spectra; THF to water ratio (e) 1.5: 1, (f) 2.8:1, (g) 4.5: 1, and (l) their UV-Vis spectra.

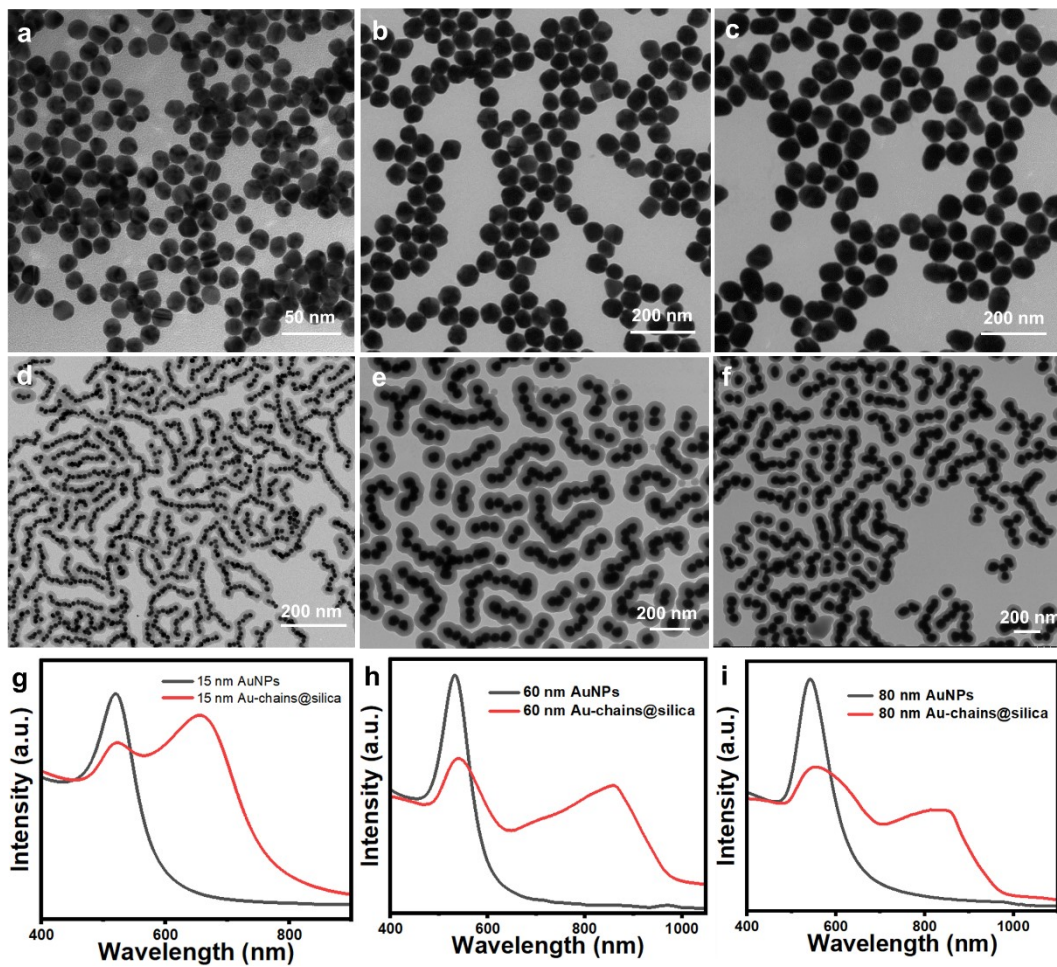

**Figure S14.** TEM images of the synthesized Au nanoparticles and the corresponding Au-chains@silica: (a, d) 15 nm, (b, e) 60 nm, and (c, f) 80 nm; and (g-i) UV-Vis extinction spectra of the samples a-f.

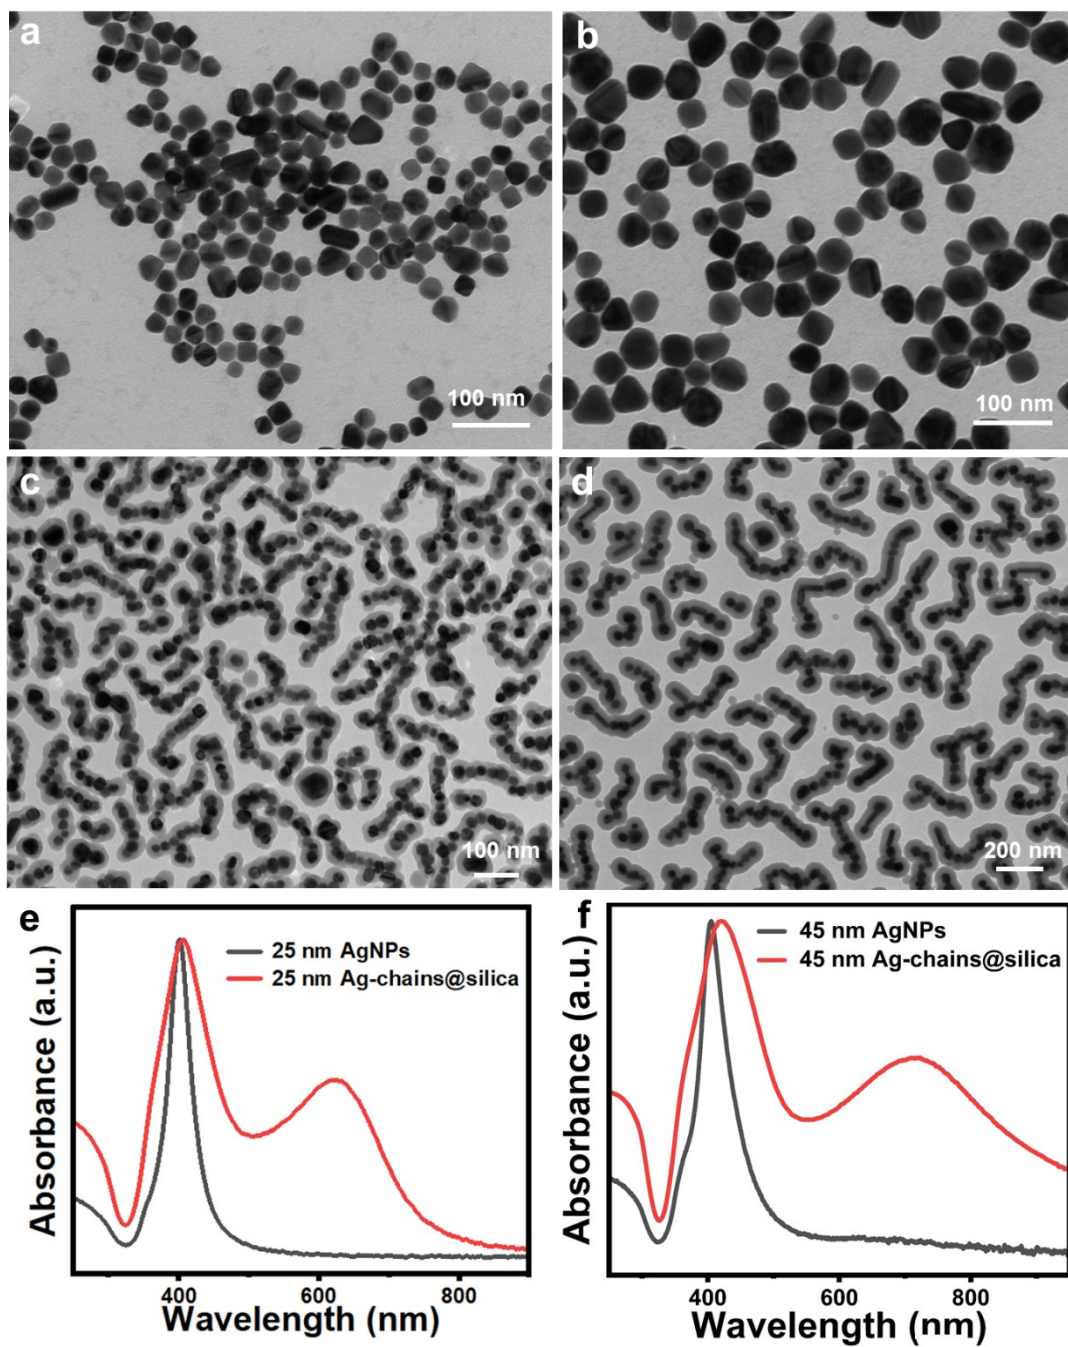

**Figure S15.** TEM images of the synthesized AgNPs and the corresponding Ag-chains@silica: (a, c) 25 nm, and (b, d) 45 nm; (e, f) UV-Vis extinction spectra of samples a-d.

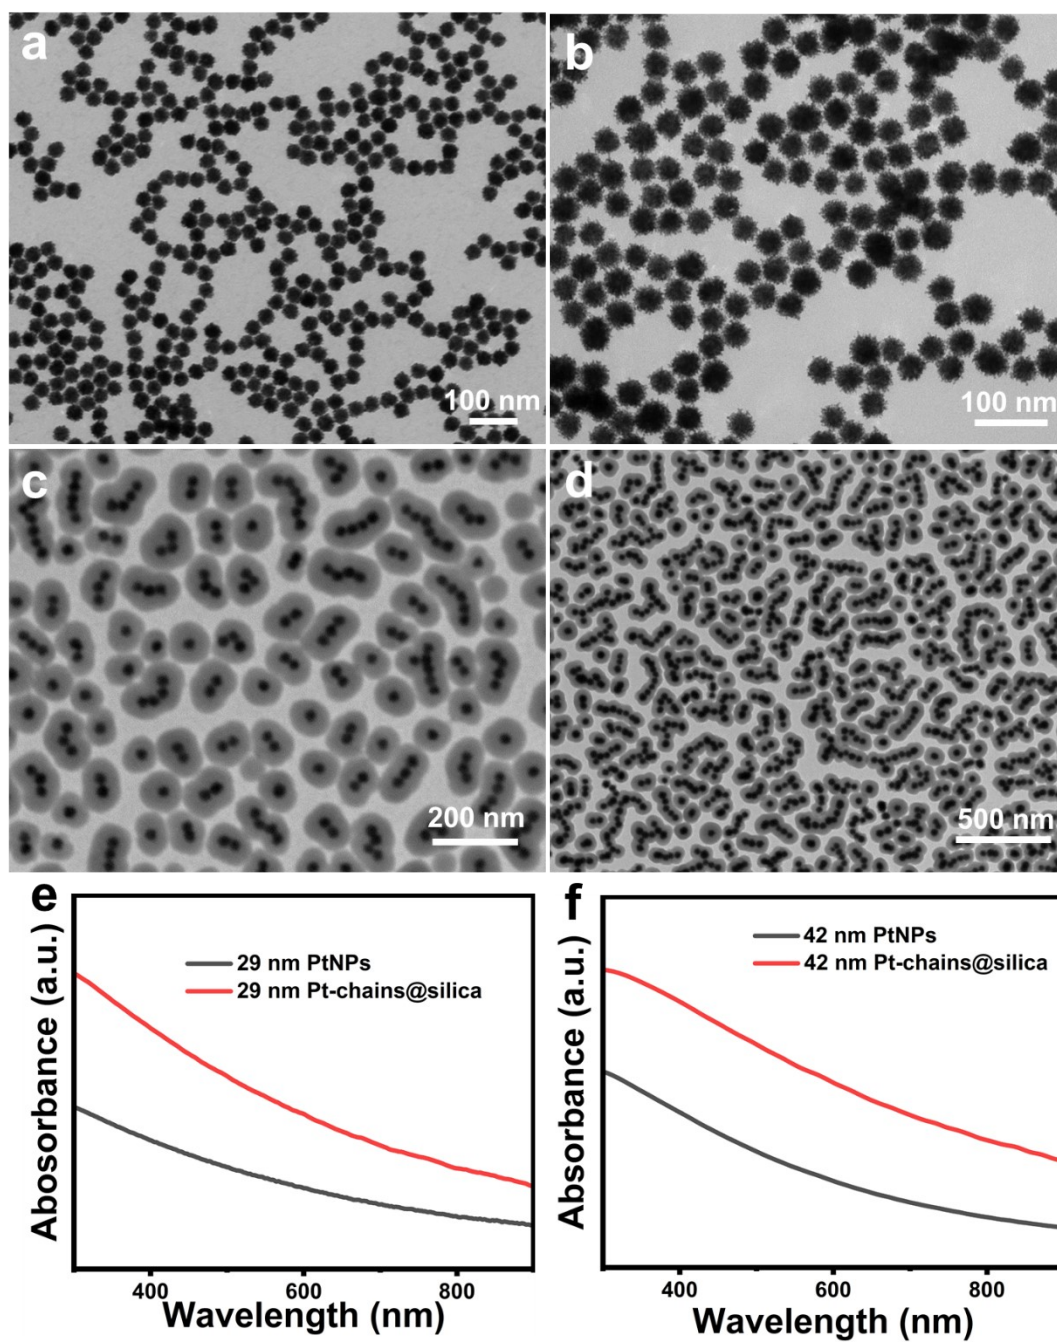

**Figure S16.** TEM images of synthesized PtNPs and the corresponding Pt-chains@silica: (a, c) 29, and (b, d) 42 nm; (e, f) the UV-Vis spectra of the samples a-d.

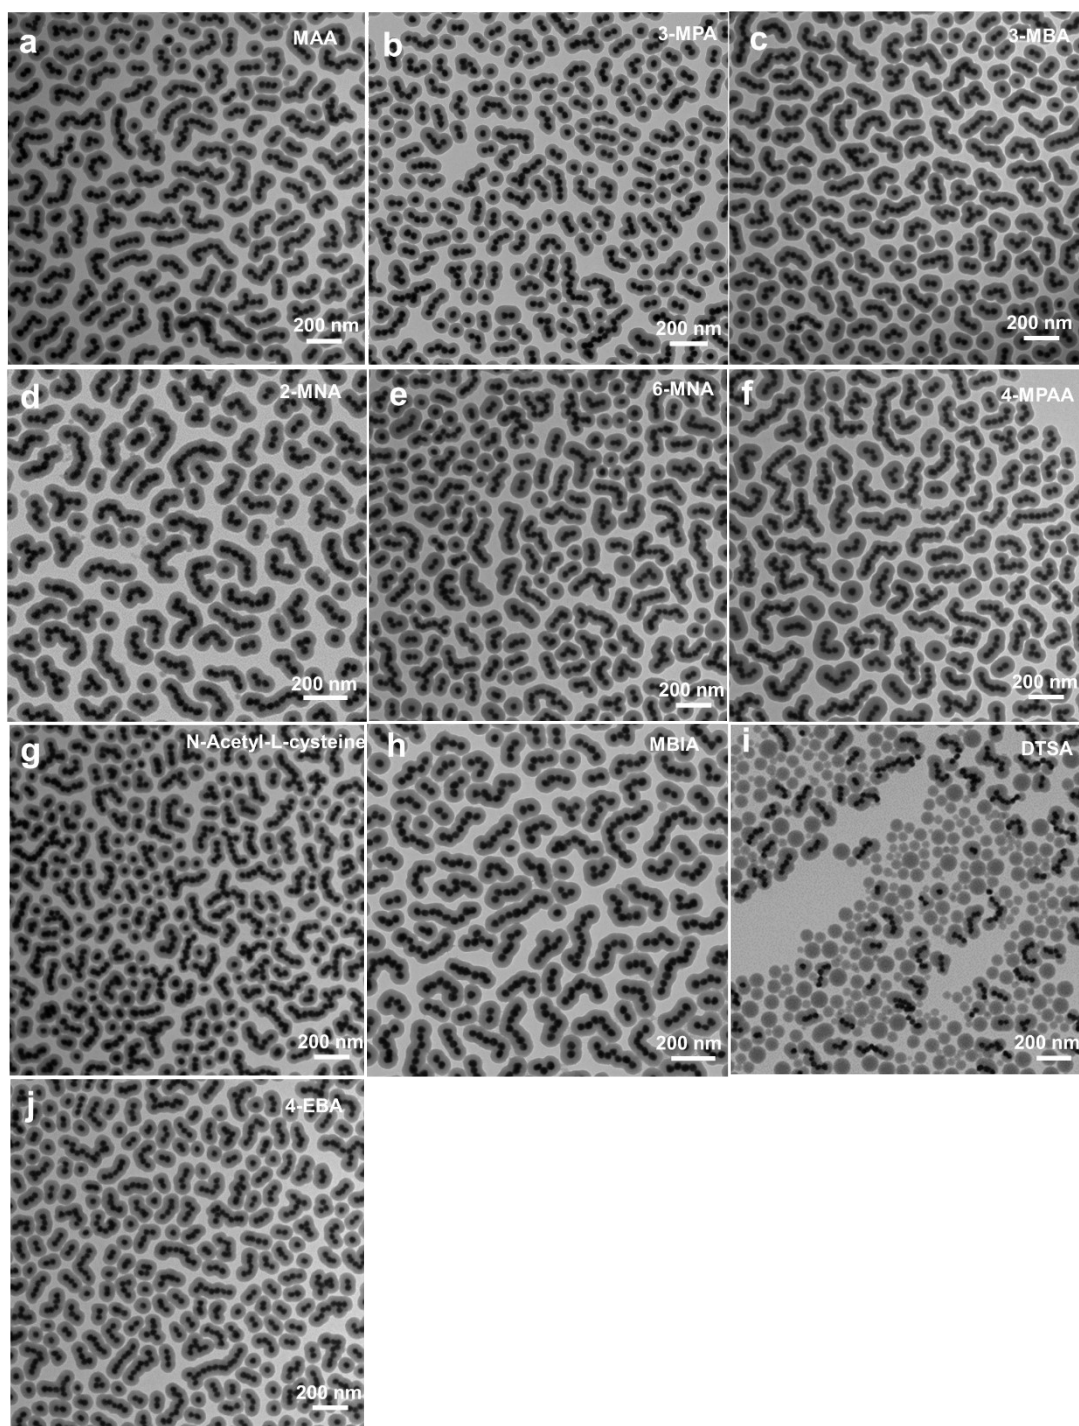

**Figure S17.** TEM images of Au-chains@silica prepared with different ligands as shown in Table 2.

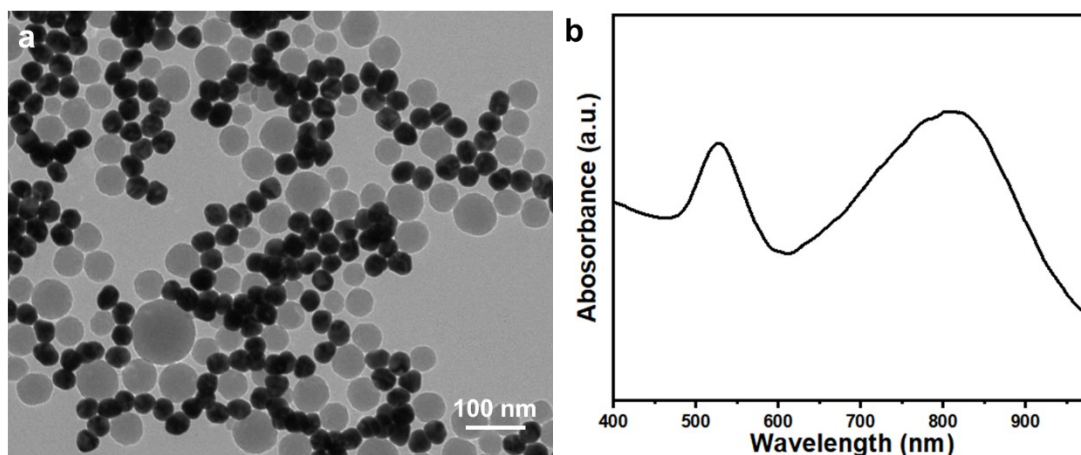

**Fig. S18.** (a) TEM image and (b) UV-Vis spectra of Au-chains@silica prepared with ligand 3-mercapto-1-propanol.

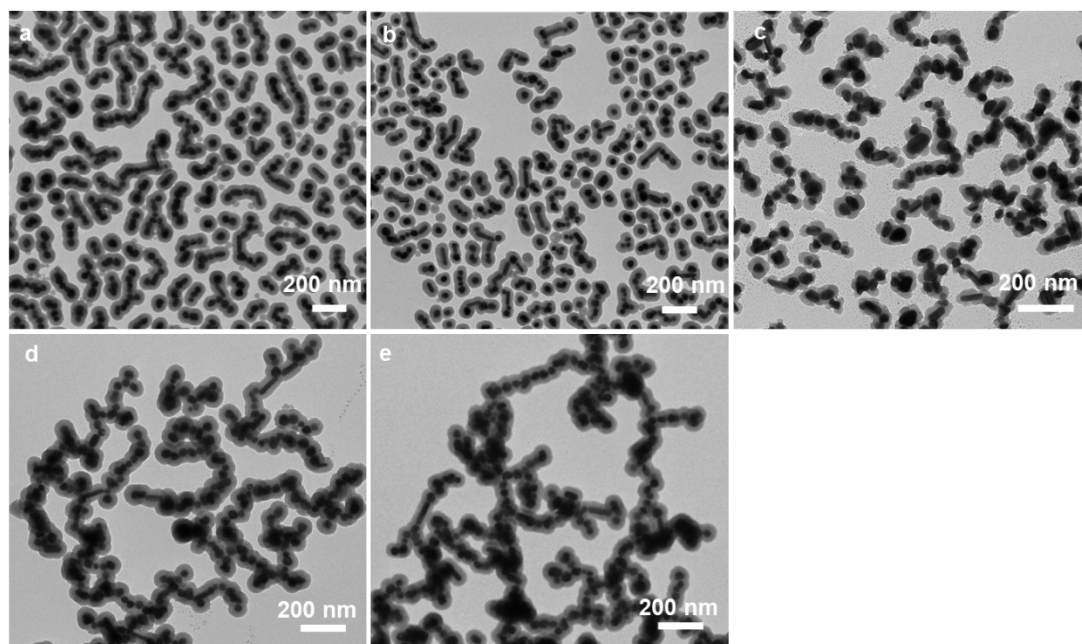

**Figure S19.** TEM images of Ag-chains@silica prepared with (a) MBA; (b) 3-MBA; (c) 2-MNA; (d) 6-MNA; and (e) MBIA.

## References

1. Y. Feng, J. He, H. Wang, Y. Y. Tay, H. Sun, L. Zhu and H. Chen, *J. Am. Chem. Soc.*, 2012, **134**, 2004-2007.
2. Y. Feng, Y. Wang, J. He, X. Song, Y. Y. Tay, H. H. Hng, X. Y. Ling and H. Chen, *J. Am. Chem. Soc.*, 2015, **137**, 7624-7627.
3. G. Frens, *Nat. Phys. Sci.*, 1973, **241**, 20-22.
4. M. Yang, G. Chen, Y. Zhao, G. Silber, Y. Wang, S. Xing, Y. Han and H. Chen, *Phys. Chem. Chem. Phys.*, 2010, **12**, 11850-111860.
5. Y. Wan, Z. Guo, X. Jiang, K. Fang, X. Lu, Y. Zhang and N. Gu, *J. Colloid. Interface. Sci.*, 2013, **394**, 263-268.
6. R. Dasari, D. A. Robinson and K. J. Stevenson, *J. Am. Chem. Soc.*, 2013, **135**, 570-

573.

7. G. Chen,, Y. Wang,, M. Yang,, J. Xu,, S. J. Goh,, M. Pan; and H. Chen., *J. Am. Chem. Soc.*, 2010, **132**, 3644-3645.
